# Supplementary material for: TGF-β signalling and PEG10 are mutually exclusive and inhibitory in chondrosarcoma cells
Source: PubMed Central journal article supplement (PMC5647403; doi:10.1038/s41598-017-13994-w), 2017-10-18

## **Supplementary Information**

**TGF- $\beta$  signalling and PEG10 are mutually exclusive and inhibitory in chondrosarcoma cells**

**Naohiro Shinohara<sup>1,2†</sup>, Shingo Maeda<sup>1†\*</sup>, Yuhei Yahiro<sup>1,2</sup>, Daisuke Sakuma<sup>1,2</sup>,  
Kanehiro Matsuyama<sup>2</sup>, Katsuyuki Imamura<sup>2</sup>, Ichiro Kawamura<sup>2</sup>, Takao Setoguchi<sup>3</sup>,  
Yasuhiro Ishidou<sup>1</sup>, Satoshi Nagano<sup>2</sup>, & Setsuro Komiya<sup>1,2,3</sup>**

<sup>1</sup>Department of Medical Joint Materials, Kagoshima University, Kagoshima, Japan

<sup>2</sup>Department of Orthopaedic Surgery, Kagoshima University, Kagoshima, Japan

<sup>3</sup>The Near-Future Locomotor Organ Medicine Creation Course, Kagoshima University,  
Kagoshima, Japan

<sup>†</sup> These authors contributed equally to this work.

## Supplementary Table S1

Primer sequences utilized in this study (5' to 3')

Human

| Gene                 | Forward                 | Reverse                  |
|----------------------|-------------------------|--------------------------|
| <i>SOX9</i>          | AGTACCCGCACTTGCACAAC    | TTCAGAAGTCTCCAGAGCTTGC   |
| <i>COL2A1</i>        | TCTGGGTTCCAGGGACTTCCT   | GAACACCCTGGTCACCTGGTTTT  |
| <i>PEG10</i>         | CGAAGAAGGGACGAGCTCTCTG  | CCTCCGACTGCTTCATGACCTT   |
| <i>TGFB1</i>         | AATTGAGGGCTTTCGCCTTAGC  | AACCCTGCGTTGATGTCCACTT   |
| <i>TGFB2</i>         | CAAAATAGACATGCCGCCCTTC  | CCATTGCTGAGACGTCAAATCG   |
| <i>TGFB3</i>         | AGCACAACGAACTGGCTGTCTG  | GGACACATTGAAGCGGAAAACC   |
| <i>BMP2</i>          | CATGATGGAAAAGGGCATCCTC  | TTAAGGCGTTTCCGCTGTTTGT   |
| <i>BMP6</i>          | TGGAGAATGCTCCTTCCCCTC   | CGGGGTTTCATAAGGTGAACCAA  |
| <i>GDF2 (BMP-9)</i>  | GGTCCAGAAACCTGCCCTTCT   | ATGGCTGATCATCTCCCTCAGC   |
| <i>TGFB1 (ALK5)</i>  | TCCAAACCACAGAGTGGGAACA  | TCGTCGAGCAATTTCCAGAAT    |
| <i>ACVR1 (ALK2)</i>  | GGGCCTTTGGACTTGTTTTGTG  | CACATCGTAGAACGGTGGCTTG   |
| <i>ACVR1B (ALK4)</i> | GAGGCATCTGCATGGGTCTTCT  | CCCTCCACCCTGATCAGACAGT   |
| <i>ACVR1C (ALK7)</i> | GGCGCTCTCAATTGCTAGTGGT  | ACCTAAGTCCGCTATGGCACA    |
| <i>BMPR1A (ALK3)</i> | ATGCGTGAGGTTGTGTGTGTC   | GGGCCAGCATTCTGACATTAG    |
| <i>BMPR1B (ALK6)</i> | GTGCCAGTGACCCCTCTTATG   | GGGGCGTAACTTCTTGATGCAC   |
| <i>SMAD1</i>         | AGAGGAGATGTTTCAGGCGGTTG | ACTTGTGGAGGAGGCATGGAAC   |
| <i>SMAD2</i>         | TGAAAGGGTGGGAGCAGAATA   | ATGCTTGAGCAACGCACTGAAG   |
| <i>SMAD3</i>         | CATGACTGTGGATGGCTTCACC  | GCTGCATTCTGTTGACATTGG    |
| <i>SMAD4</i>         | TGGGTCAACTCTCCAATGTCCA  | TCCAAC TGACACCTTTGCCTA   |
| <i>SMAD5</i>         | ACCTGAGCCACAATGAACCACA  | GAAGGGGGATAAGGGCTGTTTG   |
| <i>SMAD9</i>         | GCAGAGCCGGAAGTCAACTAT   | AGCTGAGCGAAGAGCTGGTTGT   |
| <i>GAPDH</i>         | CACCATCTTCCAGGAGCGAGAT  | TGGACTCCACGACGTA CT CAGC |

Mouse

| Gene         | Forward                | Reverse                |
|--------------|------------------------|------------------------|
| <i>Peg10</i> | AGCACGCATGACCCTCACATTA | TACGGATGCAAATTCGGTTGTG |
| <i>Hprt1</i> | CGTTGGGCTTACCTCACTGCTT | CAAAAAGCGGTCTGAGGAGGAA |

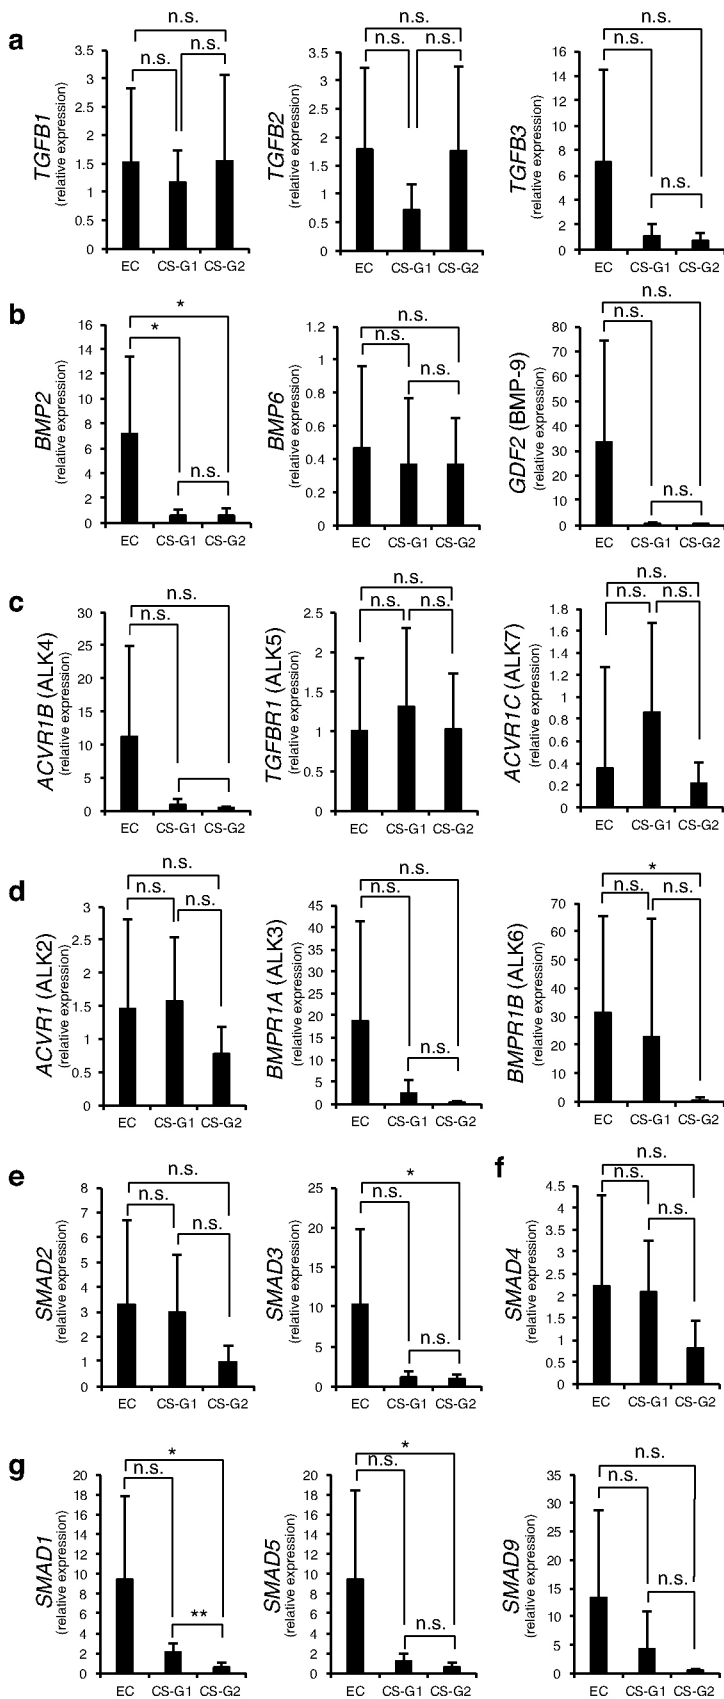

**Supplementary Figure S1. Expression of genes encoding signalling components of TGF- $\beta$  and BMP pathways.** mRNA samples from tumours were examined by RT-qPCR. EC, enchondromas (n = 6); CS-G1, grade 1 chondrosarcomas (n = 5); CS-G2, grade 2 chondrosarcomas (n = 6). \* $P < 0.05$ ; \*\* $P < 0.01$ ; n.s., not significant.

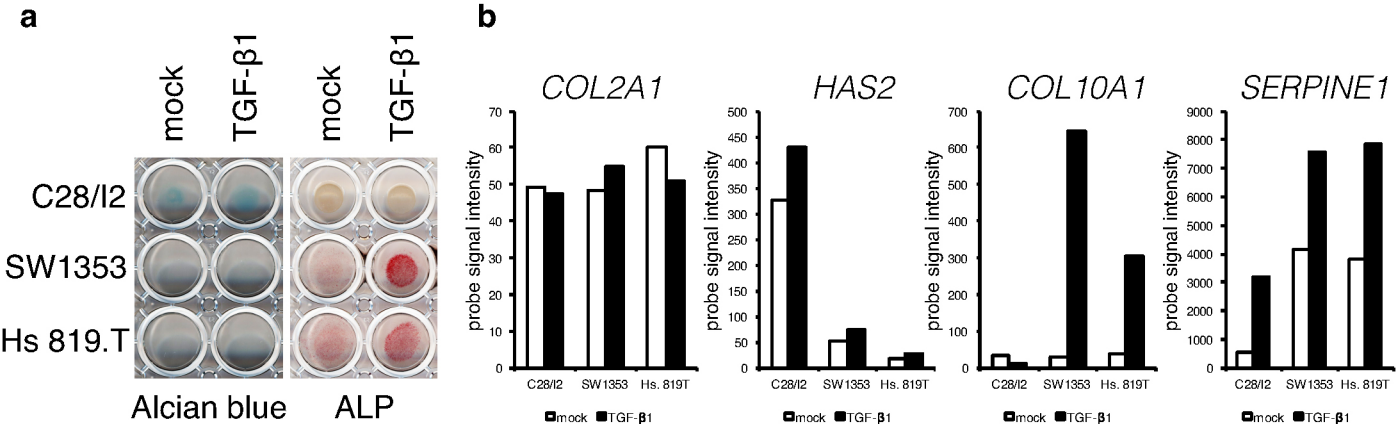

**Supplementary Figure S2. Abnormal differentiation of chondrosarcoma cells upon chondrogenic stimulation by TGF- $\beta$ 1.** (a) Micromasses of C28/I2, SW1353, and Hs 819.T cells were formed and then cultured further with or without TGF- $\beta$ 1 (1 ng/ml) for 7 days, followed by alcian blue and ALP staining. (b) Microarray analysis of *COL2A1*, *HAS2*, *COL10A1*, and *SERPINE1* expression in the experiment shown in Table 1.

## Supplementary Figure S3

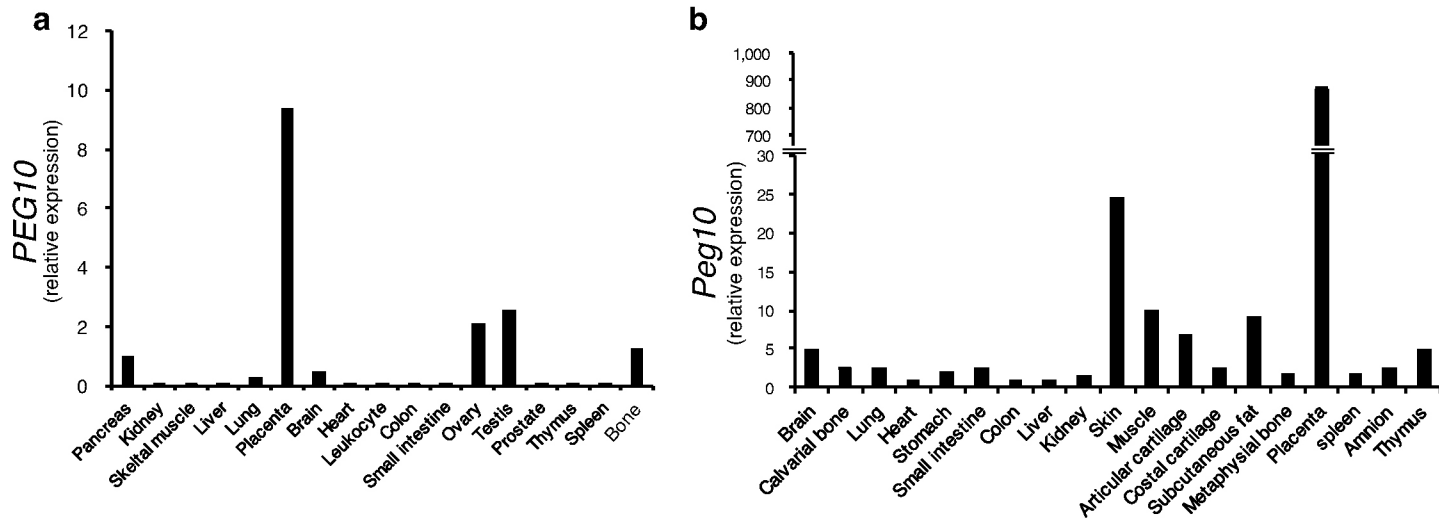

**Supplementary Figure S3. Tissue distribution of PEG10 gene expression in humans and mice.** (a, b) A multiple tissue cDNA panel of humans (a) and mice (b) was subjected to RT-qPCR analyses of *PEG10* (human) and *Peg10* (mouse).

# Supplementary Figure S4

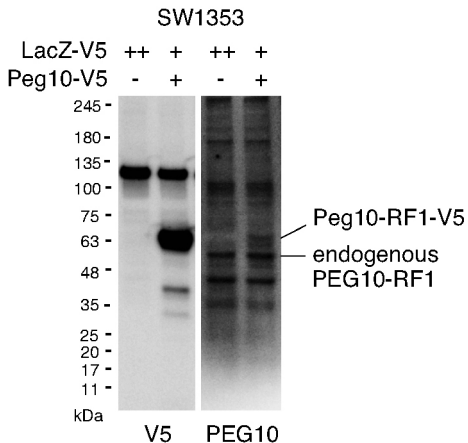

## Supplementary Figure S4. Induction of exogenous PEG10 in SW1353 cells.

SW1353 cells were transfected with control LacZ or Peg10-V5 expression plasmids overnight, followed by immunoblotting with anti-V5 or anti-PEG10 antibodies.

Full-length blots of immunoblots illustrated in Figures 3 and 4.

**Fig.3b**

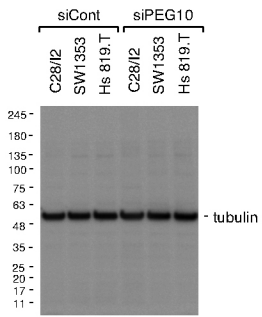

**Fig.4d**

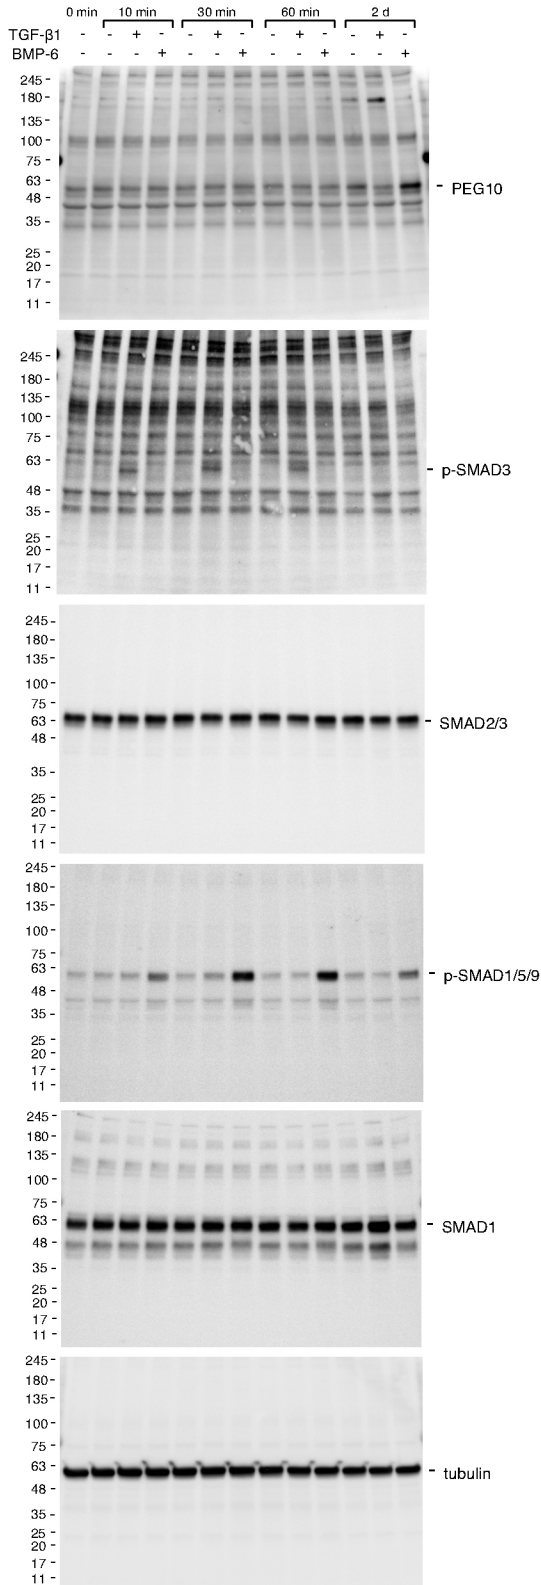

**Fig.4f**

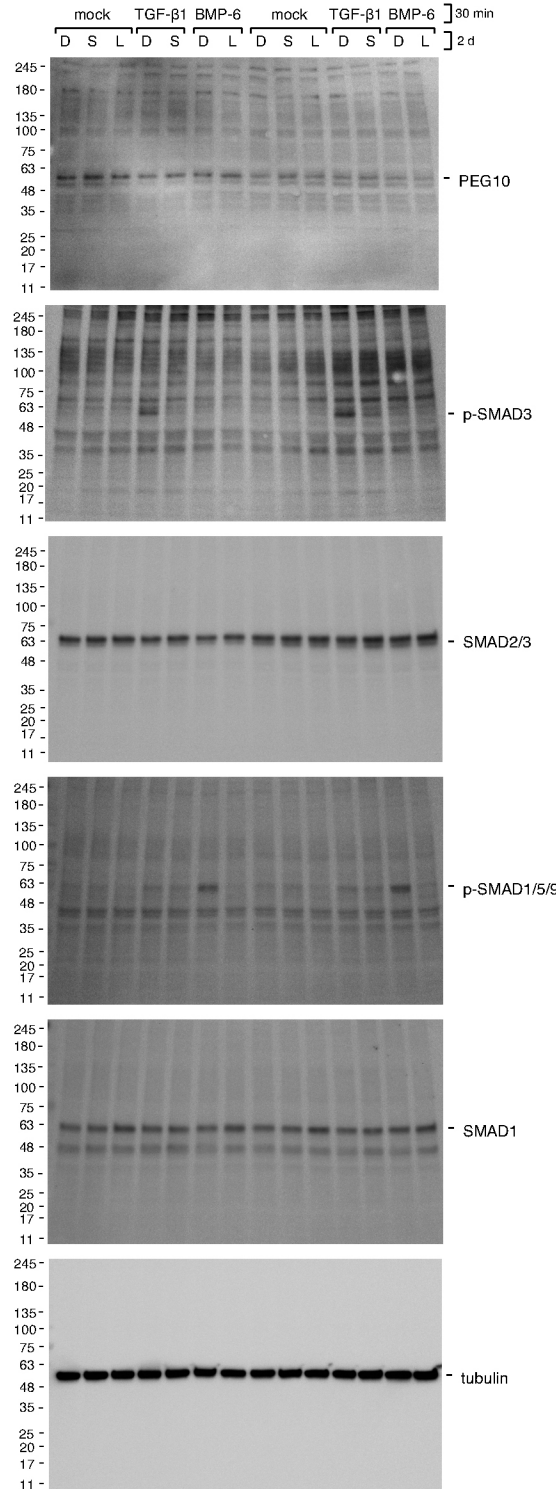

# Supplementary Figure S6

## Full-length blots of immunoblots illustrated in Figure 5c

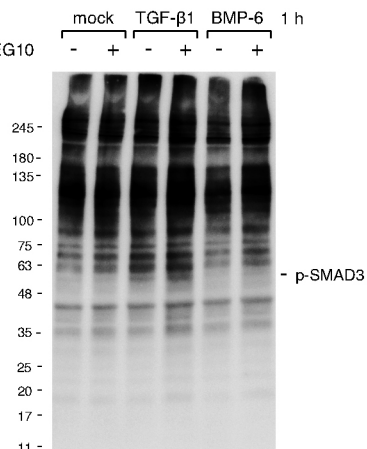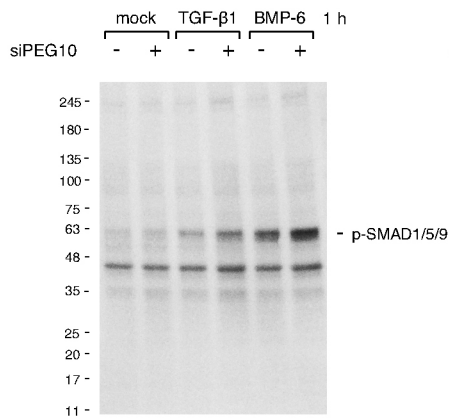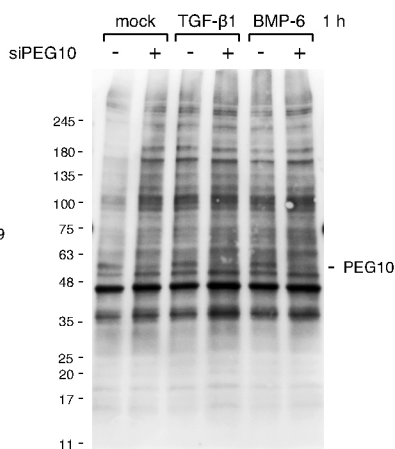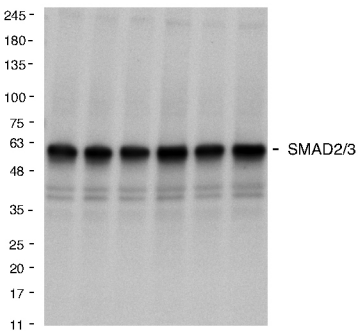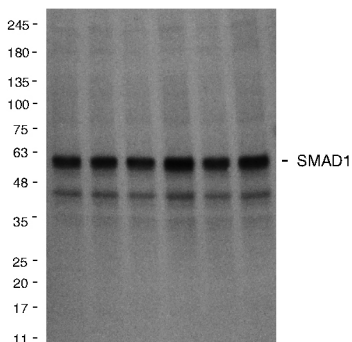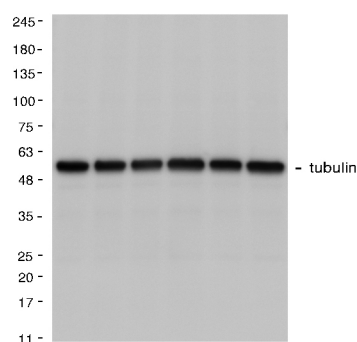

Supplement: 41598_2017_13994_MOESM1_ESM.pdf [file 41598_2017_13994_MOESM1_ESM.pdf]
